# Supplementary material for: Monoubiquitinated Histone H2A Destabilizes Photolesion-containing Nucleosomes with Concomitant Release of UV-damaged DNA-binding Protein E3 Ligase
Source: PubMed Central journal article supplement — J Biol Chem. 2012 Feb 10;287(15):12036–49. doi: 10.1074/jbc.M111.307058 (PMC3320950; doi:10.1074/jbc.m111.307058), 2012-02-10
Supplement: supp_M111.307058_jbc.M111.307058-1.pdf [file supp_M111.307058_jbc.M111.307058-1.pdf]

Supplemental Table S1: Primers for cloning histone H2A wild type and mutants

| <b>Primer</b>  | <b>DNA sequence</b>                            |
|----------------|------------------------------------------------|
| H2A 5'XhoI     | 5' TTTTCTCGAGTCTGGACGTGGTAAGCAAGGAGGC 3'       |
| H2A 3'NotI     | 5' TTTTGCGGCCGCACTTGCCCTTGGCCTTGTGGTGAC 3'     |
| H2A K119R      | 5' CCTTGGCCTGTGGTGACTCTCGGTCTTCCTAGGCAGAAG 3'  |
| H2A K120R      | 5' CCTTGGCCTTGTGGTGACTCTCGGTCTTCCTAGGCAGAAG 3' |
| H2AK119R/K120R | 5' CCTTGGCCTTGTGGTGACTCTCGGTCTTCCTAGGCAGAAG 3' |
