# Supplementary material for: Monoubiquitinated Histone H2A Destabilizes Photolesion-containing Nucleosomes with Concomitant Release of UV-damaged DNA-binding Protein E3 Ligase
Source: PubMed Central journal article supplement — J Biol Chem. 2012 Feb 10;287(15):12036–49. doi: 10.1074/jbc.M111.307058 (PMC3320950; doi:10.1074/jbc.m111.307058), 2012-02-10
Supplement: supp_M111.307058_jbc.M111.307058-2.pdf [file supp_M111.307058_jbc.M111.307058-2.pdf]

Supplemental Table S2: Primary antibodies

| <b>Antibody target</b> | <b>Species</b> | <b>Supplier</b>             | <b>Application</b> |
|------------------------|----------------|-----------------------------|--------------------|
| DDB1                   | Rabbit         | In house (Covance)          | IB                 |
| DDB2                   | Rabbit         | In house (Covance)          | IB                 |
| Cullin 4               | Goat           | Sc-5223 (Santa-Cruz)        | IB                 |
| H2A                    | Rabbit         | 14-493 (Upstate, Millipore) | IB                 |
| $\mu$ H2A              | Mouse          | 05-678 (Upstate, Millipore) | IB                 |
| H3                     | Rabbit         | 39163 (Active Motif)        | IB                 |
| Myc                    | Rabbit         | Sc-789 (Santa-Cruz)         | IB                 |
| HA                     | Mouse          | 18B12 (Covance)             | IB                 |
| FLAG                   | Mouse          | F3165 (Sigma)               | IB                 |
| CPD                    | Mouse          | MC-062 (Kamiya biomedical)  | IB                 |
| 6-4 PP                 | Mouse          | NMDND002 (Cosmo Bio)        | IB                 |
