# Supplementary material for: Monoubiquitinated Histone H2A Destabilizes Photolesion-containing Nucleosomes with Concomitant Release of UV-damaged DNA-binding Protein E3 Ligase
Source: PubMed Central journal article supplement — J Biol Chem. 2012 Feb 10;287(15):12036–49. doi: 10.1074/jbc.M111.307058 (PMC3320950; doi:10.1074/jbc.m111.307058), 2012-02-10
Supplement: supp_M111.307058_jbc.M111.307058-3.pdf [file supp_M111.307058_jbc.M111.307058-3.pdf]

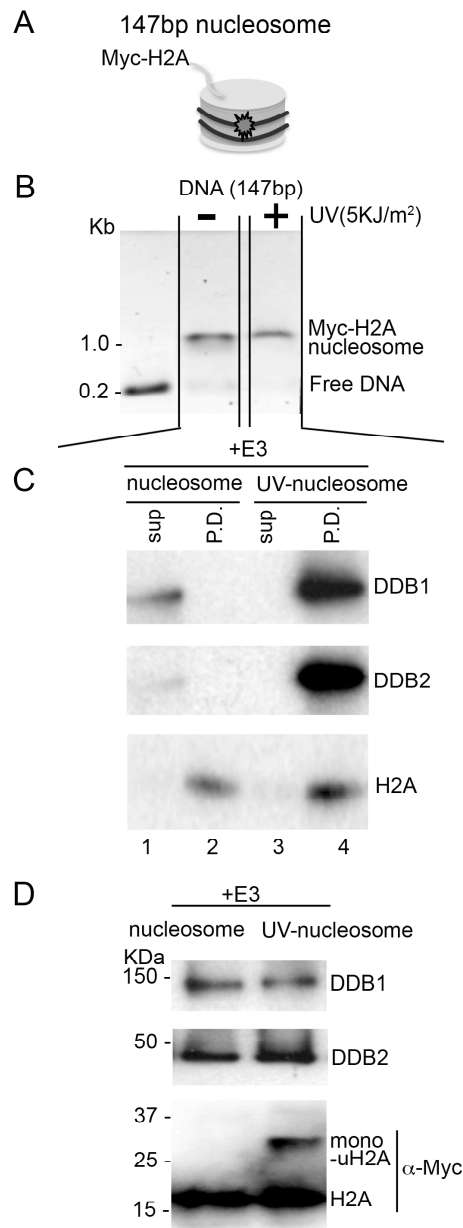

**SUPPLEMENTAL FIGURE S1.** DDB1-CUL4B<sup>DDB2</sup> E3 ligase efficiently binds mononucleosomes with a 147-bp nucleosome positioning 601 DNA sequence (+UV) and has specificity for nucleosomal histone H2A. **A.** Schematic illustration of a nucleosome without the linker DNA. **B.** Mononucleosomes reconstituted *in vitro* from the mock or UV-irradiated DNA sequence and human recombinant octamers with Myc-H2A, and analyzed on an ethidium bromide-stained agarose gel. **C.** The reconstituted nucleosomes (4 pmole), with undamaged DNA (nucleosomes) or UV-damaged DNA (UV-nucleosomes) were incubated ± DDB1-CUL4B<sup>DDB2</sup> (2 pmole), and the DNA was pulled down with streptavidin-bound Dynabeads (as in Fig 1). The supernatants (20%) (lanes 1 & 3), and pulled-down beads (lanes 2 & 4), were boiled and run on a gradient SDS-PAGE. The separated proteins were probed with the DDB1, DDB2, and H2A antibodies. **D.** The ubiquitination assay was performed with nucleosomal Myc-H2A (nucleosomes or UV-nucleosomes) as a substrate for DDB1-CUL4B<sup>DDB2</sup> E3 ligase. Membrane strips were probed with DDB1, DDB2 and Myc antibodies.
