# Supplementary material for: Monoubiquitinated Histone H2A Destabilizes Photolesion-containing Nucleosomes with Concomitant Release of UV-damaged DNA-binding Protein E3 Ligase
Source: PubMed Central journal article supplement — J Biol Chem. 2012 Feb 10;287(15):12036–49. doi: 10.1074/jbc.M111.307058 (PMC3320950; doi:10.1074/jbc.m111.307058), 2012-02-10
Supplement: supp_M111.307058_jbc.M111.307058-4.pdf [file supp_M111.307058_jbc.M111.307058-4.pdf]

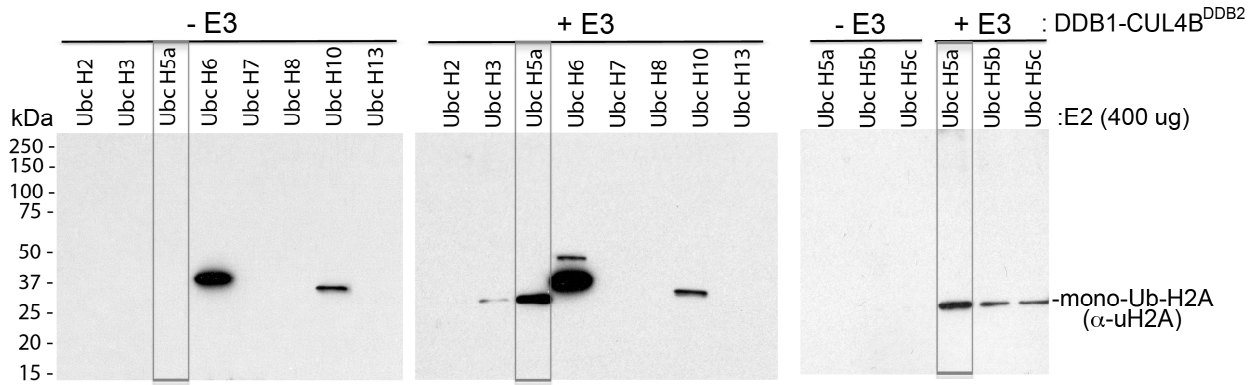

**SUPPLEMENTAL FIGURE S2.** Panel of ubiquitin-conjugating enzymes tested in ubiquitination assay with DDB1-CUL4B<sup>DDB2</sup> E3 ligase. The ubiquitin ligase activity of recombinant complex (4 pmole) was assayed with a panel of E2 proteins (Boston Biochem). Human recombinant Myc-H2A histone (70 pmole) was used as a substrate. Reactions were performed in a reaction mixture (30  $\mu$ l) which contained 50 mM Tris (pH 7.4), 1 mM DTT, 10 mM MgCl<sub>2</sub>, 0.2 mM CaCl<sub>2</sub>, 4 mM ATP, 0.1 mg/ml bovine serum albumin, 2 mM ubiquitin aldehyde, 100 ng E1 (Boston Biochem), 400 ng E2 proteins, and 1 mg human recombinant FLAG-ubiquitin (BostonBiochem). The total reaction was separated on 15% SDS-PAGE. Modified histone was detected with  $\mu$ H2A antibody.
