# Supplementary material for: Monoubiquitinated Histone H2A Destabilizes Photolesion-containing Nucleosomes with Concomitant Release of UV-damaged DNA-binding Protein E3 Ligase
Source: PubMed Central journal article supplement — J Biol Chem. 2012 Feb 10;287(15):12036–49. doi: 10.1074/jbc.M111.307058 (PMC3320950; doi:10.1074/jbc.m111.307058), 2012-02-10
Supplement: supp_M111.307058_jbc.M111.307058-5.pdf [file supp_M111.307058_jbc.M111.307058-5.pdf]

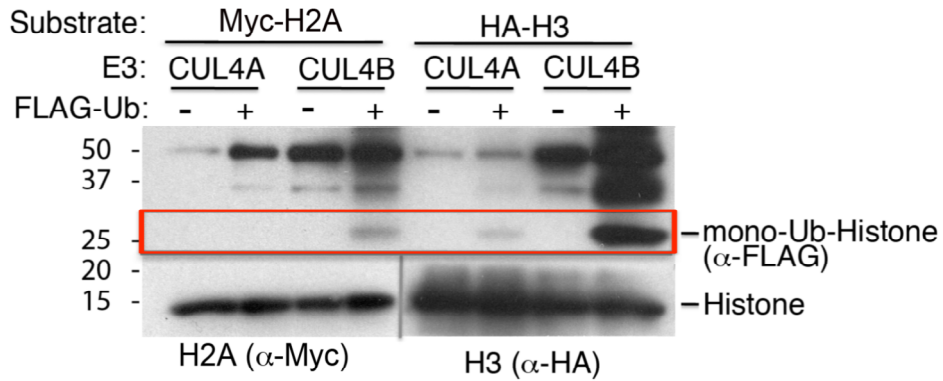

**SUPPLEMENTAL FIGURE S3.** The DDB1-CUL4B<sup>DDB2</sup> E3 ligase is more efficient in ubiquitinating histone H2A and H3 than DDB1-CUL4A<sup>DDB2</sup> E3 ligase. Free Myc-H2A or HA-H3 was used as a substrate for DDB1-CUL4<sup>DDB2</sup> E3 ligases (4 pmole). Each ubiquitination assay was performed  $\pm$  FLAG-ubiquitin (FLAG-Ub). The total reaction was separated on 15% SDS-PAGE. Unmodified Myc-H2A and HA-H3 were detected with Myc and HA antibodies respectively; modified histones were detected with FLAG antibody. Unmodified and modified FLAG-tagged-DDB2, around position 50 kDa and above, respectively, were detected with FLAG antibody.
